# Supplementary material
Source: ML conference proceedings conference paper supplement (https://openreview.net/forum?id=uGnGlUMFqI)
Supplement: supplementary_material [file attachment]

## The Agreement for the Portrait rights

I hereby consent to the usage of my portrait as part of the dataset being constructed through the research project titled "The Effect of Digital Technology on the Development of Industry-Academic Cooperation". I agree that my portrait may be replicated, distributed, publicly transmitted, broadcasted, or otherwise disclosed or used through various media such as paintings, photographs, videos, or any other means,

2022.10.24

(Name) : [REDACTED]  
(Contact) : 010-1102-0020  
(Address) : [REDACTED]  
[REDACTED]  
[REDACTED]

### [ Consent to Provision and Use of Personal Information ]

1. Items of personal information collected: Basic information such as name, affiliation, and address
2. Purpose of collection and use of personal information: Disclosure of portrait, confirmation of intention such as use
3. Retention and use period of personal information: From the time of writing the personal information provision agreement to the end of the purpose of use

[REDACTED] e.

## The Agreement for the Portrait rights

I hereby consent to the usage of my portrait as part of the dataset being constructed through the research project titled "The Effect of Digital Technology on the Development of Industry-Academic Cooperation". I agree that my portrait may be replicated, distributed, publicly transmitted, broadcasted, or otherwise disclosed or used through various media such as paintings, photographs, videos, or any other means,

2022.10.24

(Name) : [REDACTED]

(Contact) : [REDACTED]

(Address) : [REDACTED]  
[REDACTED]

[ Consent to Provision and Use of Personal Information ]

4. Items of personal information collected: Basic information such as name, affiliation, and address
5. Purpose of collection and use of personal information: Disclosure of portrait, confirmation of intention such as use
6. Retention and use period of personal information: From the time of writing the personal information provision agreement to the end of the purpose of use

[REDACTED] e.

## The Agreement for the Portrait rights

I hereby consent to the usage of my portrait as part of the dataset being constructed through the research project titled "The Effect of Social Media on the Perception of Industry-Academic Collaboration". I agree that my portrait may be replicated, distributed, publicly transmitted, broadcasted, or otherwise disclosed or used through various media such as paintings, photographs, videos, or any other means,

2022.10.24

(Name) : Y. H. H.  
(Contact) : 091-4-1181-2121  
(Address) : 091-4-1181-2121

[ Consent to Provision and Use of Personal Information ]

7. Items of personal information collected: Basic information such as name, affiliation, and address
8. Purpose of collection and use of personal information: Disclosure of portrait, confirmation of intention such as use
9. Retention and use period of personal information: From the time of writing the personal information provision agreement to the end of the purpose of use

\_\_\_\_\_ e.
