# Supplementary material
Source: ML conference proceedings conference paper supplement (https://openreview.net/forum?id=uGnGlUMFqI)
Supplement: supplementary_material [file attachment]

# Terms of Reference

## 1. General description

- a. Project : Recording dance performances for neural rendering research
- b. Term : 2022.10.25(Tue.)
- c. Payment : 2,000,000 won

## 2. Service

- a. Term : 2022.10.25(1 day)
- b. Content : Filming a video of a dance performance as part of building a dataset for neural rendering research

## 3. Service details

- a. Performance plan
  - i. Personnel : 3 people(1 male, 2 females)
  - ii. Choreograph
    - 1. Total : 10 songs(3 songs/dancer + 1 song/group)
      - a. dancer 1 : Idle - Nxde / Chungha - Sparkling / Lesserafim - ANTIFRAGILE
      - b. dancer 2 : Zico - Freak / ITZY - not shy / aespa - girls
      - c. dancer 3 : SuperM - Tiger / SuperM - Jopping / EXO - Obsession
    - 2. Costume
      - a. Change of clothes for each song (no black)
    - 3. Duration
      - a. Total recording time : 4 hours
        - i. 20 minutes/dancer \* 3 times
        - ii. extra time : recording setting, break time

## 4. Notice of service

- a. Commencement of service
  - i. Occasional report : If there is a request from the owner, the progress shall be reported from time to time.

## 5. Service fee payment method

- a. Issuance of electronic tax invoice with 100% payment upon service completion
