# Supplementary material
Source: ML conference proceedings conference paper supplement (https://openreview.net/forum?id=uGnGlUMFqI)
Supplement: supplementary_material [file attachment]

## Letter of consent(Service)

1. Service : Recording dance performances for neural rendering research
2. Term : 2022.10.25(Tue.) (1 day)
3. Payment : 2,000,000 won (VAT including)
4. Payment terms : Full payment upon completion
5. Additional information: In accordance with the attached Terms of Reference.

We agree to comply with the instructions of the responsible party and fulfill the contract within the contract period, including any amendments or temporary suspensions of the contract due to unavoidable circumstances at your end, regarding the matters mentioned above, bidding specifications, task instructions, field briefing notes, general conditions of the contract, special conditions of the contract, and integrity-specific conditions of the contract. We accept and acknowledge that we will not raise any objections in such cases.

We affirm that the exempted contract performance bond (10% of the contract amount) will be paid to your organization in cash in the event of non-performance of contractual obligations.

2022.10.24

Contractor's address : 100-111, Seongnam-daero, Seongnam-si, Gyeonggi-do  
Yongin-si, Gyeonggi-do

Company name : L [REDACTED]

Representative : H [REDACTED]

Signature : [REDACTED]

Business registration number : 3 [REDACTED]
